# Supplementary material
Source: HighWire-hosted journal article supplement (https://bjsm.bmj.com/content/bjsports-2016-097089)

**Appendix A**

**Rehabilitation Intervention**

Each rehabilitation session was approximately 1 hour in length and took place with a physiotherapist every 12-16 days depending on subject availability. Two physiotherapists undertook all physical assessments and exercise prescription and reviewed their practice together every two months to ensure continuity between them. The first rehabilitation session started on the same day as the initial diagnostic assessment.

**Exercise Selection**

**Level 1**

The subjects were taken through each of the level 1 rehabilitation exercise streams (Table 1 & 2; Figure 1) with the difficulty of the exercise selected progressed or regressed depending on the subjects ability to execute with appropriate technique (good form and no reproduction of symptoms). Exercises focused not only on segmental control between 2 segments across one joint (i.e. hip flexor, abdominal, lateral control) but also multisegmental co-ordination through squat, lunge and deadlift. Where a weight was included (i.e. deadlift) the weight selected was modified to allow the subject reach the appropriate number of repetitions and progressed as strength improved. The equipment required was a squat rack, a high and low box or chair and cones. The importance of correct technique was repeatedly emphasized. Level 1 exercises were included throughout the duration of the rehabilitation programme with those streams that the athlete displayed full competency on being maintained in 1 session per week.

**Level 2**

These sessions commenced with linear running drills focusing on lumbopelvic control and posture, swing leg recovery and increased rate of force development (Table 3 & 4). Once they had completed the drills they carried out the Linear A running programme (Table 5) which was designed to complement the running drills while assessing the subjects’ running load tolerance and suitability for progression. It started with low volume and low intensity, both of which increased at different points through the programme. If a subject had any increase in symptoms the morning after a running session, they were instructed to repeat the same running session when scheduled until they could tolerate it and then progress to the next session.

**Level 3**

In Level 3, the linear running was progressed to Linear B running programme (Table 6) which saw a reduction in volume but increase in intensity starting first from a rolling start but then progressing to a standing start. The linear running drills were maintained as a warm up to this session and were accompanied by multidirectional drills. The focus of the multidirectional drills was to improve segmental control, lateral rate of force development and improve agility prior to returning to sports specific movement (Tables 7 & 8). They were executed at as high an intensity as possible without reproduction of symptoms. If a subject had any increase in symptoms the morning after a Level 3 session, they were instructed to repeat the same session at the same intensity when scheduled until they could tolerate it and then progress to the next session.

**Progression Criteria**

Progression from level 1 to level 2 was indicated once the subject had a negative crossover sign(13) which was usually achieved by the second session.

Progression from level 2 to level 3 was indicated once the subject had symmetrical internal hip rotation at 90**°**, pain-free squeeze at 45**°** and symptom free completion of the Linear A running programme.

Progression from level 3 to repeat 3D testing and return to play was symptom free completion of the Linear B running programme and symptom free completion of the multidirectional drills at maximum intensity.

Any subject who did not meet the criteria to progress to the next level at their review appointment went back through each of the components of that level of the rehabilitation programme and a rehab tracker, which they filled out between appointments charting progress, to identify any potential barriers to progression at the next review appointment.

**Dosage**

The subjects were instructed to complete 3-4 sets of 6-8 reps of each exercise in Level 1 four times per week (i.e. two days on, 1 day off) at their own training base.

The level 2 linear running sessions were also introduced 3 times per week, with at least one day rest in between sessions. They could be done on the same day or another day as a Level 1 session as best suited the subjects schedule. On days when both sessions were done on the same day, the level 1 session was to be completed first. The linear drills were carried out for 5-6 reps and 3-4 sets with a high emphasis on quality and intensity prior to commencing linear running programme A.

The level 3 sessions followed the same schedule as level 2 (3 times per week with 1 day rest in between). The multidirectional drills were carried out for 5-6 reps and 3-4 sets with a high emphasis on quality and intensity and were preceded by the linear drills and followed by the Linear B running programme.

**Programme Compliance**

Each subject was given a printed handout of all the exercises and main cues for each, in addition to each exercise being captured on video using Dartfish**™** software for all exercises and levels of the programme and the videos hosted online for the subject to review between sessions. Subjects completed a “rehab tracker” between review sessions which noted compliance as well as any issues with any of the exercises which could be assessed at the next review. Subjects were advised that should any exercise reproduce their groin symptoms, they should review their videos and amend their technique to resolve and if unable to do so these exercises should be discontinued and their assigned physiotherapist contacted.

Table 1 – Level 1 Exercise streams and reason for inclusion

Table 2 – Level 1 streams and progressions

Figure 1 – Intersegmental control and strength – Deadlift


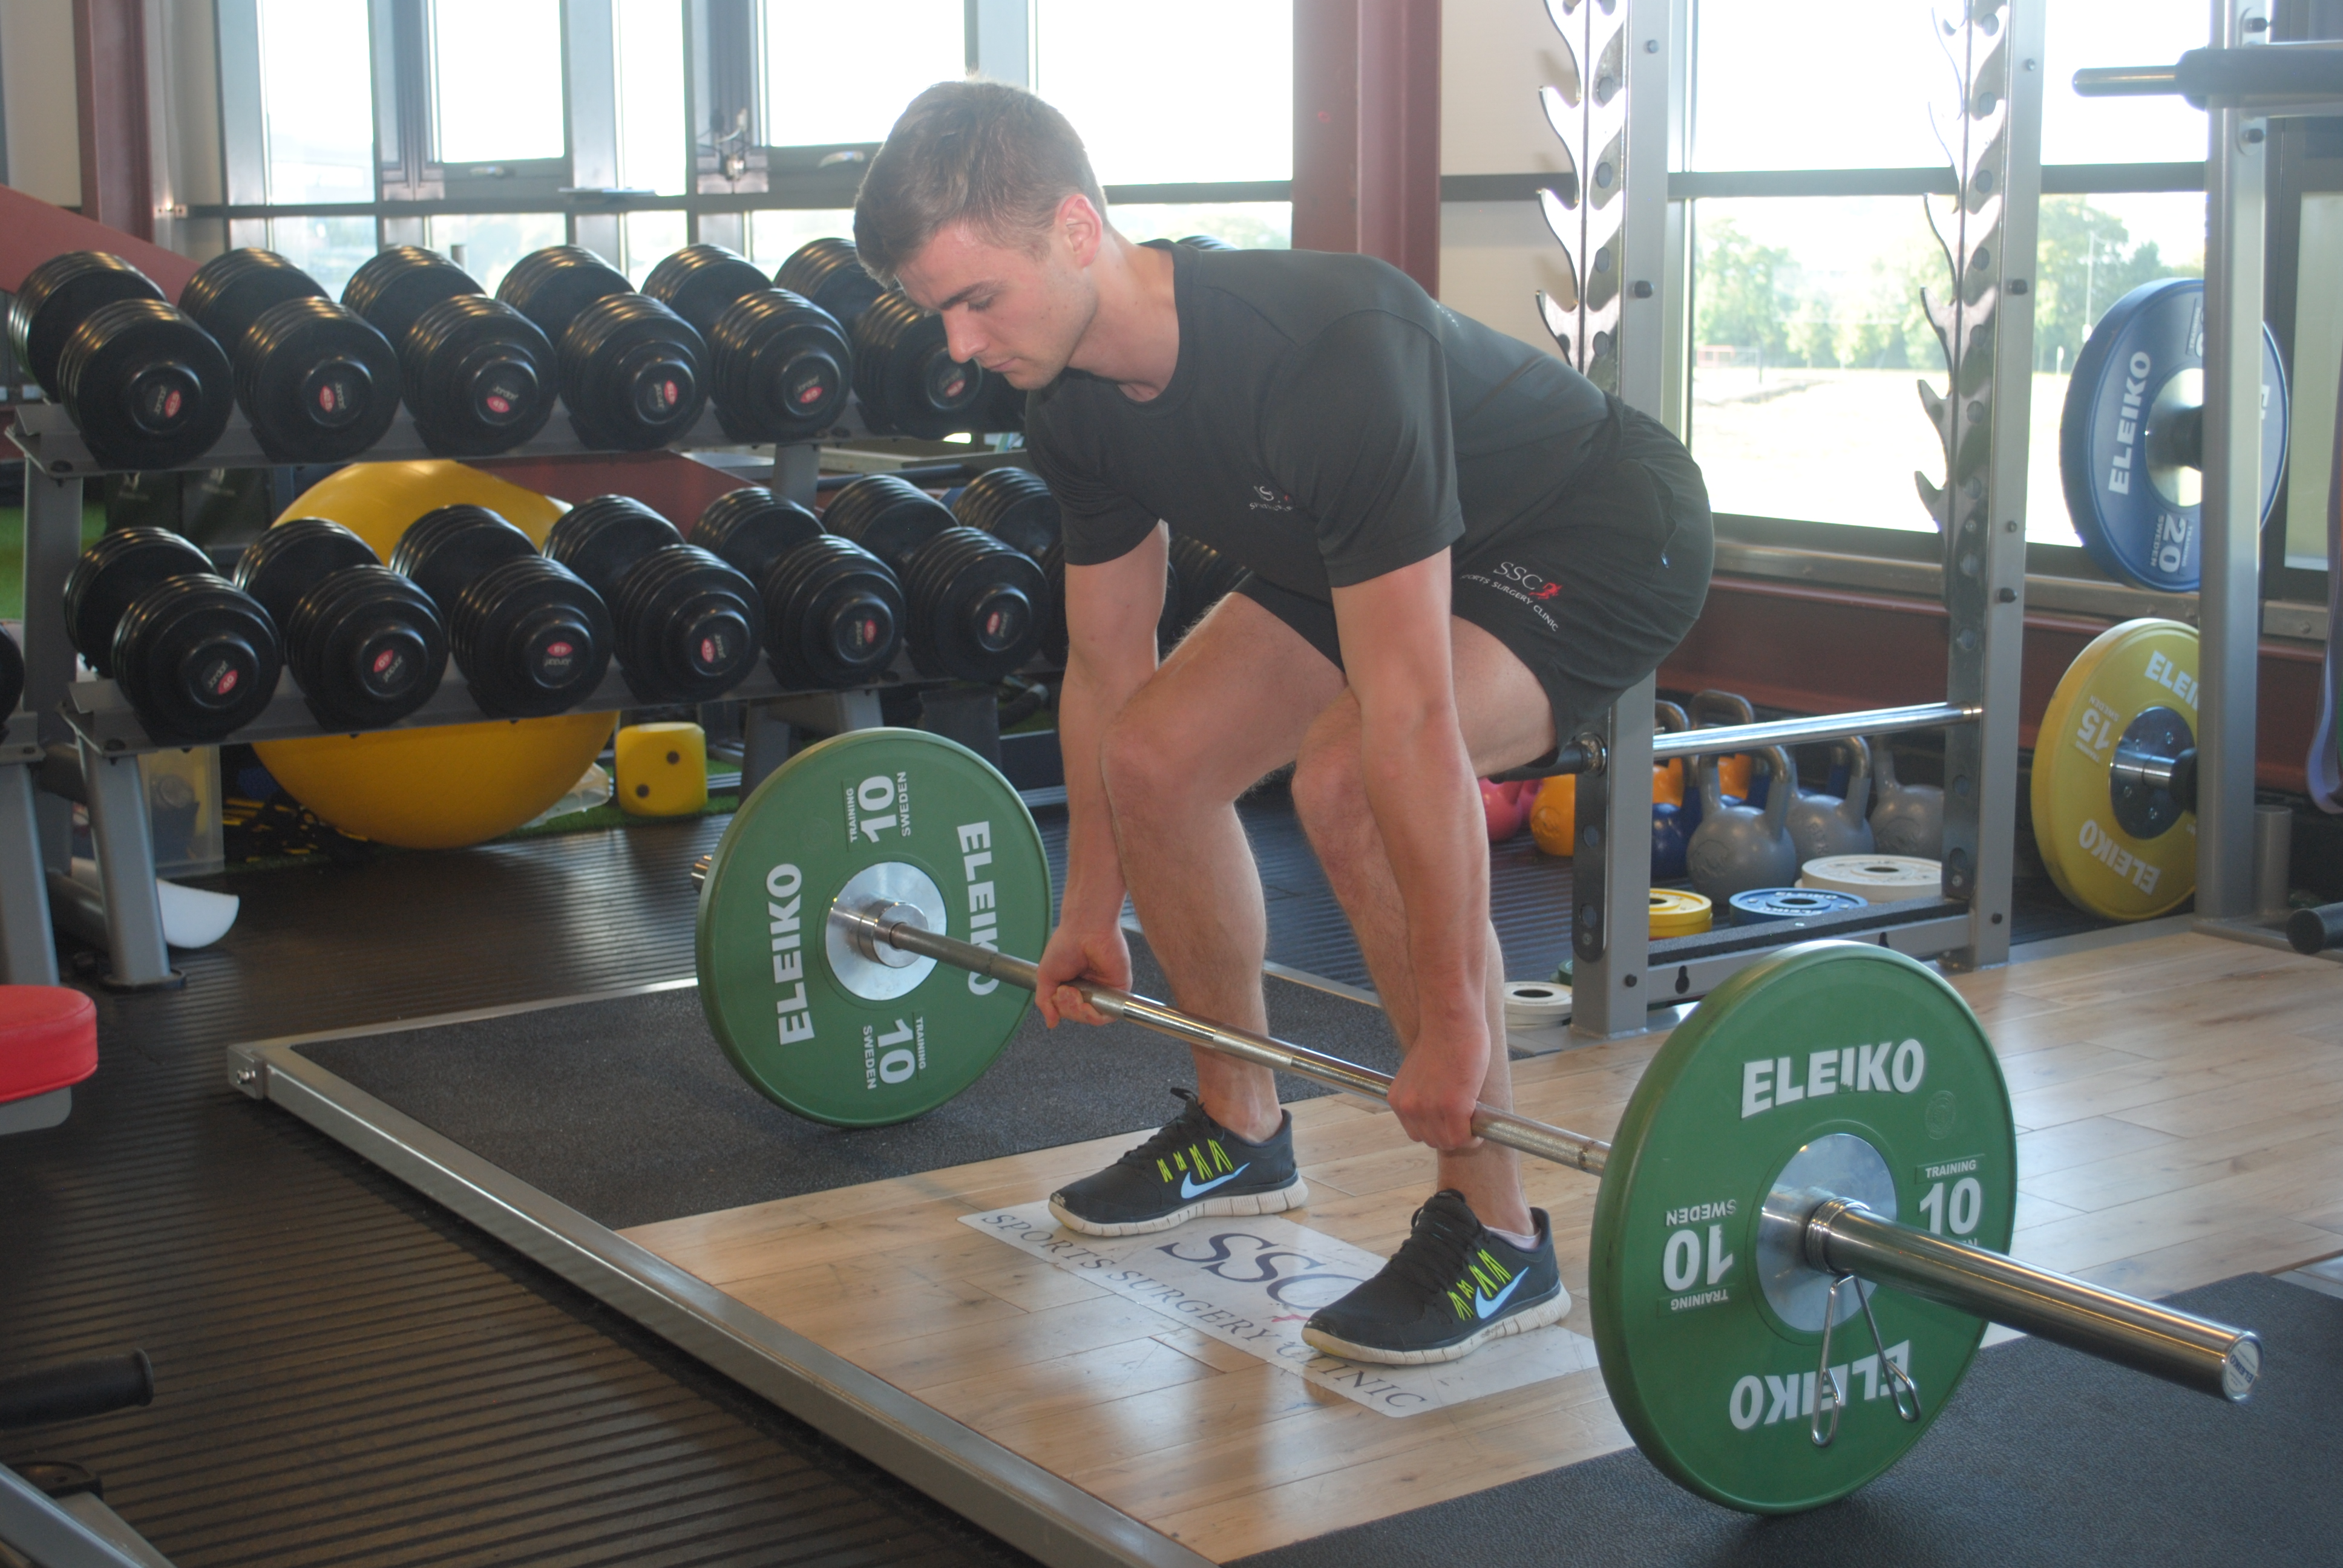


Table 3 Linear Running Drills and reason for inclusion

| **Linear Drills** | **Reason for Inclusion** |
| --- | --- |
| **Marching/Skipping** | Focus on maintaining neutral lumbopelvic position and trunk posture while maximising vertical ground reaction force production |
| **Barbell/Overhead Running** | Focus on maintaining neutral lumbopelvic position and minimising overstride and excessive trunk rotation |
| **Leg Change Drill** | Focus on stance leg stiffness and swing leg recovery |

Table 4 – Linear Running Drills Instruction

Table 5– Linear A Running Programme

Table 6 – Linear B Running Programme

Figure 2 Linear running mechanics – skipping


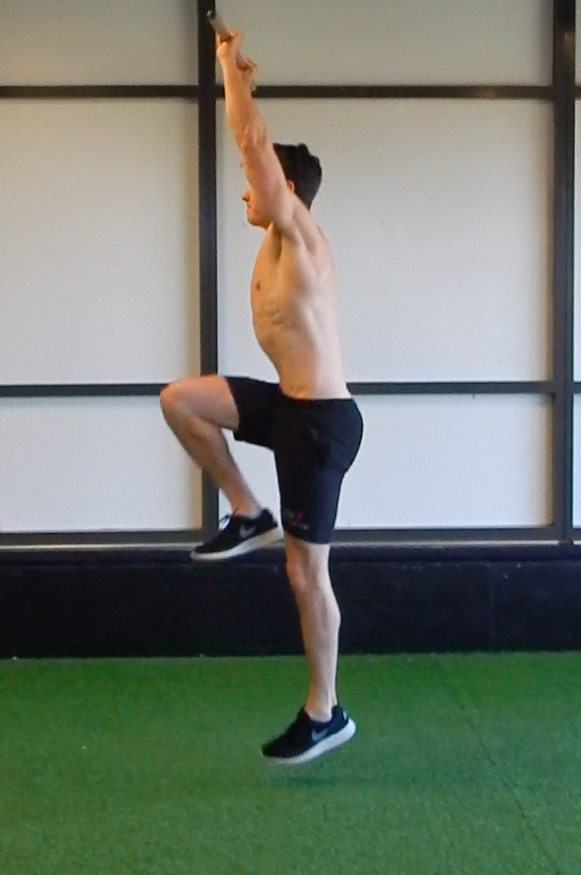


Table 7 - Multidirectional Running Drills and reason for inclusion

Table 8 – Multidirectional Running Drills

Figure 3 Multidirectional Drill – Shuffle Drill


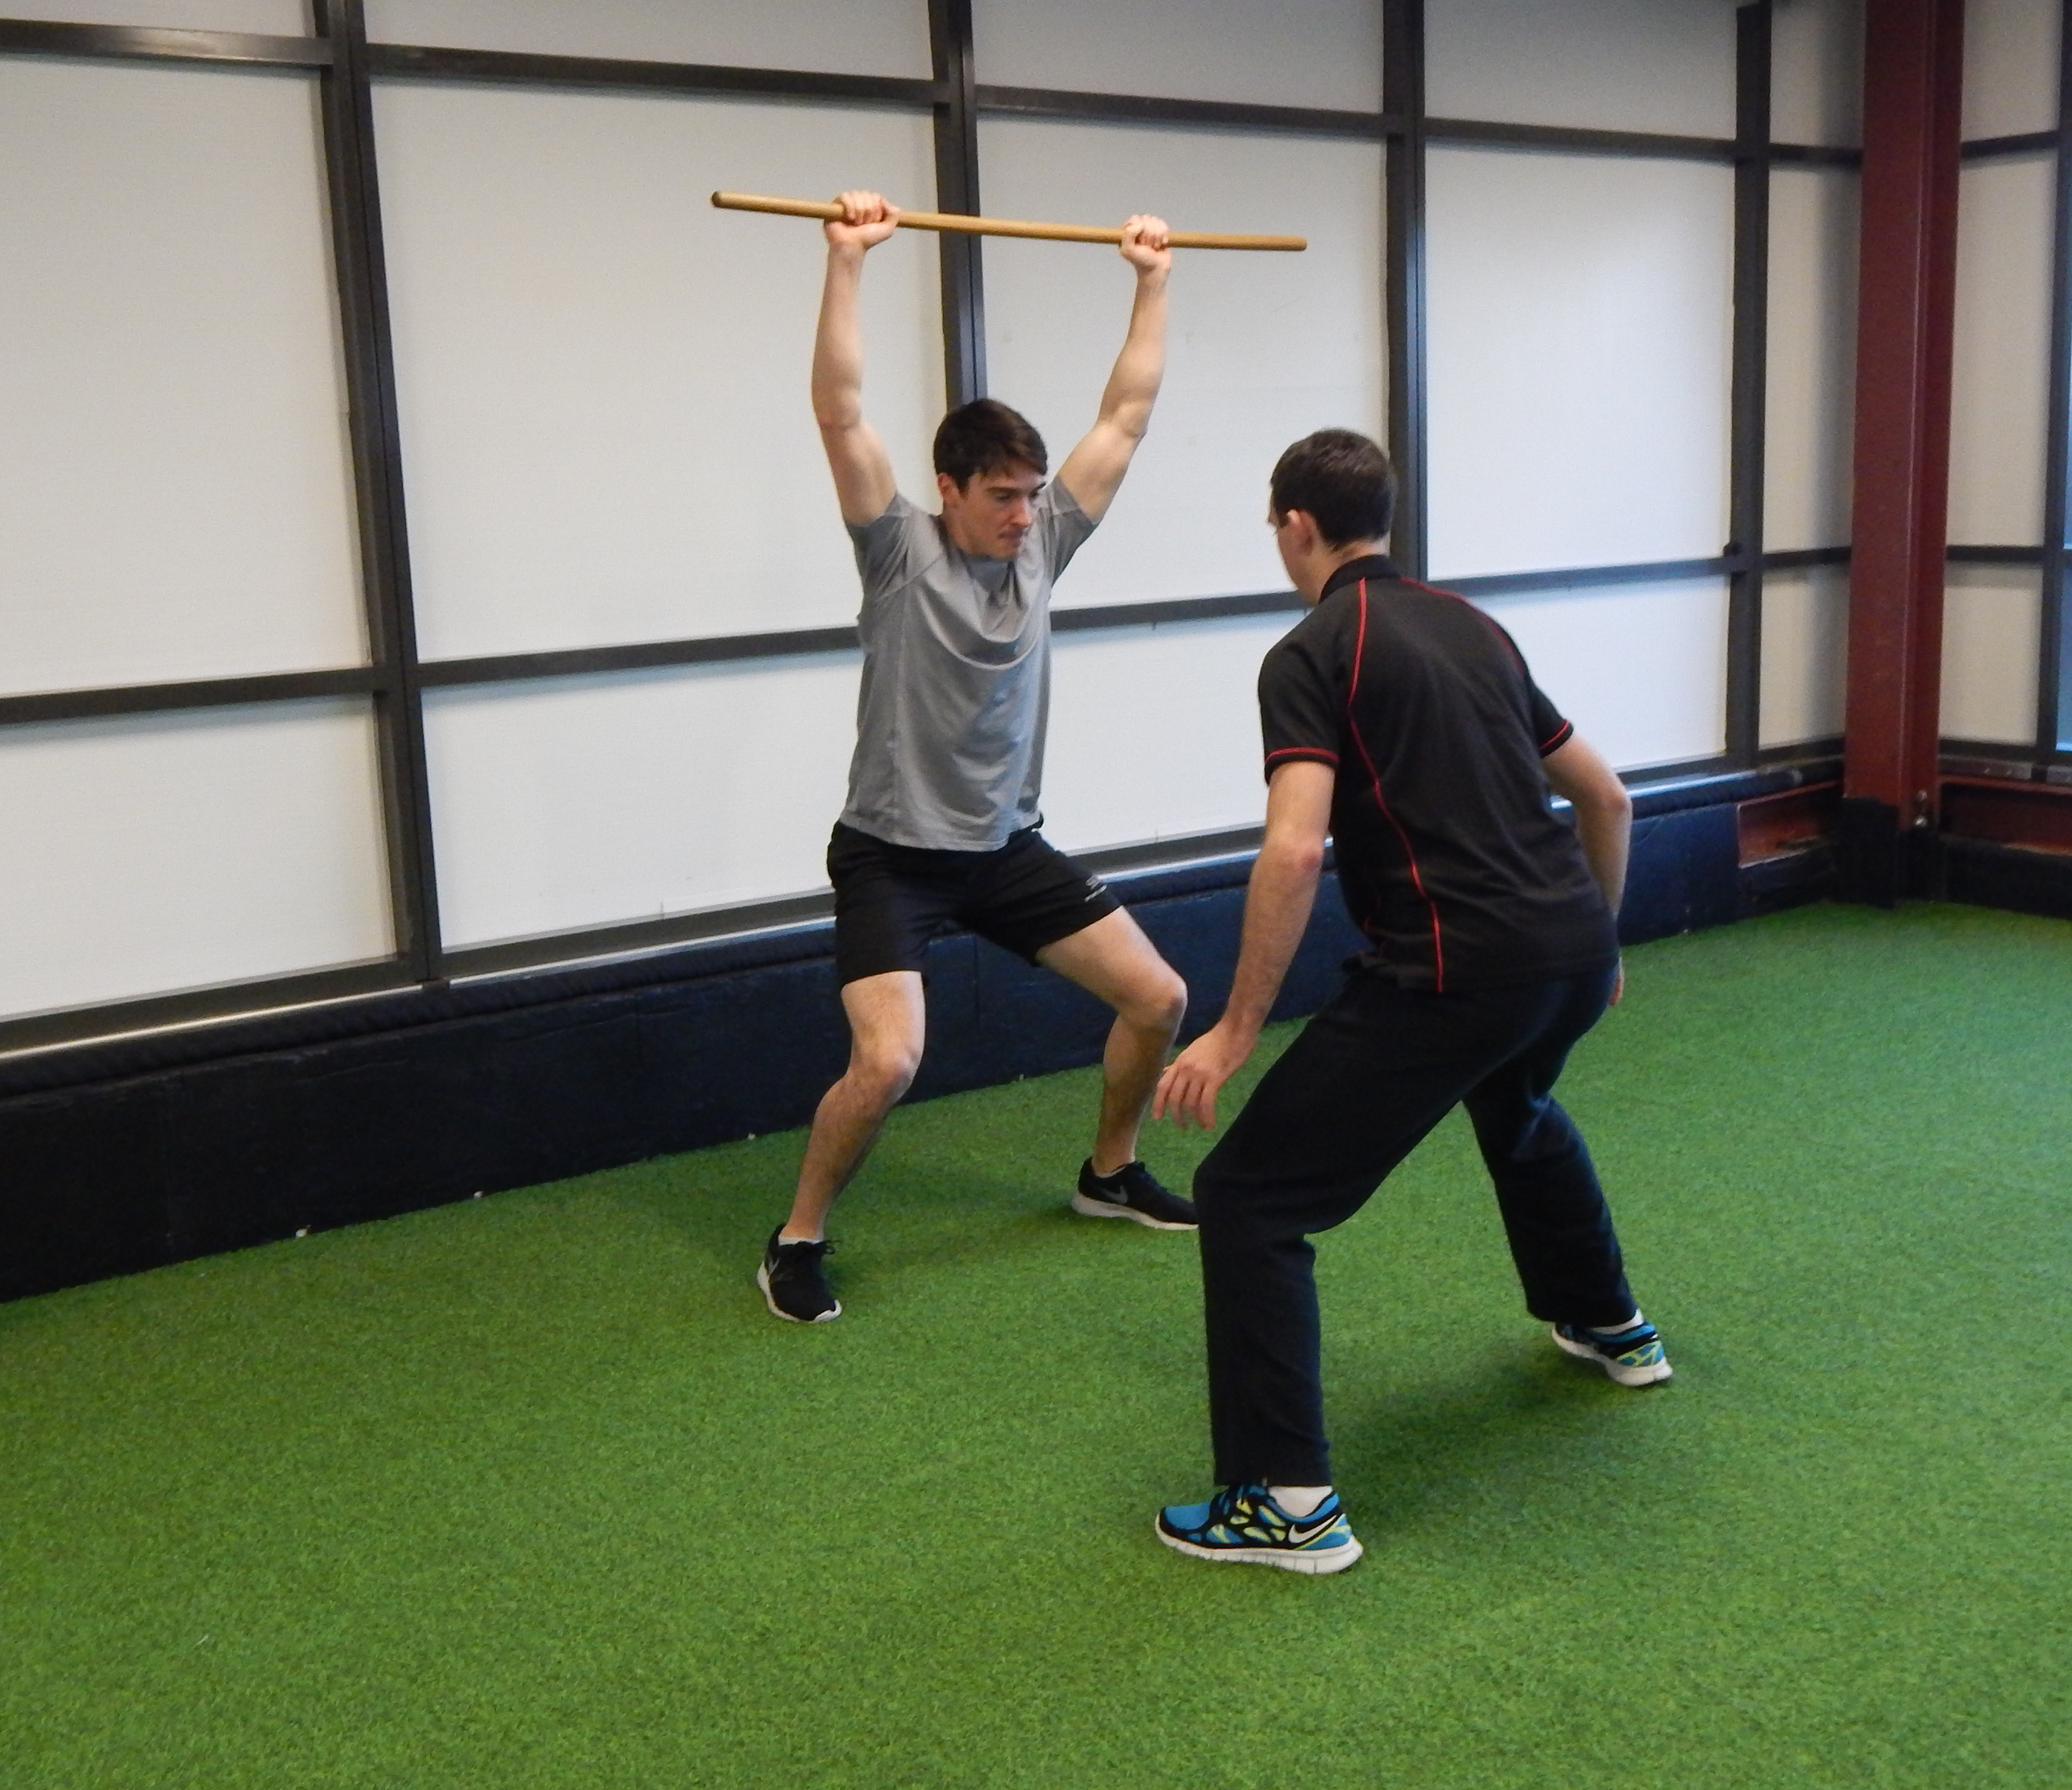

Supplement: inline-supplementary-material-1 [file inline-supplementary-material-1.docx]
